# Supplementary material for: Predicting physiologically-relevant oxygen concentrations in precision-cut liver slices using mathematical modelling
Source: PubMed Central journal article supplement (PMC9629643; doi:10.1371/journal.pone.0275788), 2022-11-02
Supplement: pone.0275788.s001.pdf [file pone.0275788.s001.pdf]

# Minimal Data Set

This document details the parameter values used in the paper "Predicting physiologically-relevant oxygen concentrations in precision-cut liver slices using mathematical modelling" to produce figures 2-7.

The parameters values contained in the table below are used in every simulation in the paper

## Figure 2

- a)  $\phi_0 = 160$ ,  $h_1 = 3.149 \times 10^{-3}$ ,  $h_2 = 3.399 \times 10^{-3}$ ,  $r_T = 2.5 \times 10^{-3}$
- b)  $\phi_0 = 160$ ,  $h_1 = 3.149 \times 10^{-3}$ ,  $h_2 = 3.399 \times 10^{-3}$ ,  $r_T = 4 \times 10^{-3}$
- c)  $\phi_0 = 160$ ,  $h_1 = 1.575 \times 10^{-3}$ ,  $h_2 = 1.825 \times 10^{-3}$ ,  $r_T = 2.5 \times 10^{-3}$
- d)  $\phi_0 = 160$ ,  $h_1 = 1.575 \times 10^{-3}$ ,  $h_2 = 1.825 \times 10^{-3}$ ,  $r_T = 4 \times 10^{-3}$
- e)  $\phi_0 = 160$ ,  $h_1 = 0$ ,  $h_2 = 2.5 \times 10^{-4}$ ,  $r_T = 2.5 \times 10^{-3}$
- f)  $\phi_0 = 160$ ,  $h_1 = 0$ ,  $h_2 = 2.5 \times 10^{-4}$ ,  $r_T = 4 \times 10^{-3}$

## Figure 3

- a)  $\phi_0 = 609.524$ ,  $h_1 = 3.149 \times 10^{-3}$ ,  $h_2 = 3.399 \times 10^{-3}$ ,  $r_T = 2.5 \times 10^{-3}$
- b)  $\phi_0 = 609.524$ ,  $h_1 = 3.149 \times 10^{-3}$ ,  $h_2 = 3.399 \times 10^{-3}$ ,  $r_T = 4 \times 10^{-3}$
- c)  $\phi_0 = 609.524$ ,  $h_1 = 1.575 \times 10^{-3}$ ,  $h_2 = 1.825 \times 10^{-3}$ ,  $r_T = 2.5 \times 10^{-3}$
- d)  $\phi_0 = 609.524$ ,  $h_1 = 1.575 \times 10^{-3}$ ,  $h_2 = 1.825 \times 10^{-3}$ ,  $r_T = 4 \times 10^{-3}$
- e)  $\phi_0 = 609.524$ ,  $h_1 = 0$ ,  $h_2 = 2.5 \times 10^{-4}$ ,  $r_T = 2.5 \times 10^{-3}$
- f)  $\phi_0 = 609.524$ ,  $h_1 = 0$ ,  $h_2 = 2.5 \times 10^{-4}$ ,  $r_T = 4 \times 10^{-3}$

## Figure 4

- a)  $\phi_0 = 723.810$ ,  $h_1 = 3.149 \times 10^{-3}$ ,  $h_2 = 3.399 \times 10^{-3}$ ,  $r_T = 2.5 \times 10^{-3}$
- b)  $\phi_0 = 723.810$ ,  $h_1 = 3.149 \times 10^{-3}$ ,  $h_2 = 3.399 \times 10^{-3}$ ,  $r_T = 4 \times 10^{-3}$
- c)  $\phi_0 = 723.810$ ,  $h_1 = 1.575 \times 10^{-3}$ ,  $h_2 = 1.825 \times 10^{-3}$ ,  $r_T = 2.5 \times 10^{-3}$
- d)  $\phi_0 = 723.810$ ,  $h_1 = 1.575 \times 10^{-3}$ ,  $h_2 = 1.825 \times 10^{-3}$ ,  $r_T = 4 \times 10^{-3}$
- e)  $\phi_0 = 723.810$ ,  $h_1 = 0$ ,  $h_2 = 2.5 \times 10^{-4}$ ,  $r_T = 2.5 \times 10^{-3}$
- f)  $\phi_0 = 723.810$ ,  $h_1 = 0$ ,  $h_2 = 2.5 \times 10^{-4}$ ,  $r_T = 4 \times 10^{-3}$

| Parameter   | Value                                    |
|-------------|------------------------------------------|
| $H$         | 3.4mm                                    |
| $h_2 - h_1$ | $2.5 \times 10^{-4}\text{m}$             |
| $r_o$       | 1.1mm                                    |
| $D_1$       | $1.6 \times 10^{-9}\text{m}^2/\text{s}$  |
| $D_2$       | $4.85 \times 10^{-9}\text{m}^2/\text{s}$ |
| V           | $0.057\text{s}^{-1}$                     |

Table 1: The parameter values used within the numerical simulations.

### Figure 5

a) To produce the blue line:

$$\phi_0 = 160, \quad h_1 = 2.1531 \times 10^{-3}, \quad h_2 = 2.4031 \times 10^{-3}, \quad r_T = 2.5 \times 10^{-3}.$$

To produce the red line:

$$\phi_0 = 160, \quad h_1 = 1.6881 \times 10^{-3}, \quad h_2 = 1.9381 \times 10^{-3}, \quad r_T = 2.5 \times 10^{-3}.$$

b) To produce the blue line:

$$\phi_0 = 160, \quad h_1 = 2.2614 \times 10^{-3}, \quad h_2 = 2.5114 \times 10^{-3}, \quad r_T = 4 \times 10^{-3}.$$

To produce the red line:

$$\phi_0 = 160, \quad h_1 = 2.2419 \times 10^{-3}, \quad h_2 = 2.4919 \times 10^{-3}, \quad r_T = 4 \times 10^{-3}.$$

### Figure 6

To create this plot, we solve the Partial Differential Equation (PDE) 101 times using equally spaced values of  $h_2$  in the range

$$2.5 \times 10^{-4} \leq h_2 \leq 3.399 \times 10^{-3}.$$

The other parameters are chosen as follows:

$$\phi_0 = 160, \quad h_1 = h_2 - 2.5 \times 10^{-4}, \quad H = 3.4 \times 10^{-3}, \quad r_T = 2.5 \times 10^{-3}$$

### Figure 7

To create this plot, we solve the Partial Differential Equation (PDE) 101 times using equally spaced values of  $H$  in the range

$$5.01 \times 10^{-4} \leq H \leq 1.01 \times 10^{-2}.$$

The other parameters are chosen as follows:

$$\phi_0 = 160, \quad h_1 = h_2 - 2.5 \times 10^{-4}, \quad h_2 = H - 1e - 6 \quad r_T = 2.5 \times 10^{-3}$$
